# Supplementary material for: Development of novel biochar derived from Bacopa monnieri leaves for adsorptive removal of pendimethalin herbicide from binary and ternary pesticide mixture
Source: Royal Society of Chemistry journal article supplement (doi:10.1039/d5ra07351k), 2026-01-01
Supplement: d5ra07351k1.pdf [file d5ra07351k1.pdf]

**Development of novel biochar derived from *Bacopa monnieri* leaves for  
adsorptive removal of pendimethalin herbicide from binary and ternary  
pesticide mixture**

Shreya Thakor<sup>1†</sup>, Gautam Priyadarshi<sup>2†</sup>, Bhakti Patel<sup>2</sup>, Santosh Kumar Sahu<sup>2</sup>, Sherzodbek  
Tashbaev<sup>3</sup>, Gulomov Gafurjon Shavkatbek Ugli<sup>4</sup>, Esha Rami<sup>1\*</sup>, Dipak Kumar Sahoo<sup>5\*</sup> and

Ashish Patel<sup>2\*</sup>

<sup>1</sup> Department of Life Sciences, Parul Institute of Applied Science, Parul University, Vadodara-  
391760, Gujarat, India; shreyathakor0823@gmail.com (S.T.)

<sup>2</sup> Department of Life Sciences, Hemchandracharya North Gujarat University, Patan-384265,  
Gujarat, India; priyadarshigautam411@gmail.com (G.P.); bhaktipatel2233@gmail.com (B.P.);  
santoshsahu.hngu@gmail.com (S.K.S)

<sup>3</sup> Department of Zoology and Biochemistry, Andijan State University, Andijan, Uzbekistan;  
sherzodbektashbaev@gmail.com (S.T.)

<sup>4</sup> Department of Genetics and Biotechnology, Andijan State University, Andijan, Uzbekistan;  
gulomovgafur47@gmail.com (G.G.S.U.)

<sup>5</sup> Department of Veterinary Clinical Sciences, College of Veterinary Medicine, Iowa State  
University, Ames, Iowa, USA

**† These authors contributed equally and share the first authorship**

**\*Corresponding authors:** esha.rami82036@paruluniversity.ac.in (E.R.);

dsahoo@iastate.edu (D.K.S.); uni.ashish@gmail.com (A.P.)

## Supplementary Information

**Table S.1 Adsorption kinetic models equations and their parameters**

| <b>Kinetic models</b> | <b>Linear</b>                                           | <b>Non-linear</b>                         | <b>Kinetic parameters</b>                                                                                                                                                                                                      |
|-----------------------|---------------------------------------------------------|-------------------------------------------|--------------------------------------------------------------------------------------------------------------------------------------------------------------------------------------------------------------------------------|
| <b>PFO</b>            | $\log(q_e - q_t) = \log q_e - \frac{k_1}{2.303} t$      | $q_t = q_e - (1 - e^{-k_1 t})$            | $q_t$ = Adsorbed amount at time t (mg g <sup>-1</sup> )<br>$q_e$ = Adsorbed amount at equilibrium (mg g <sup>-1</sup> )<br>$K_1$ = Pseudo-first-order rate constant (min <sup>-1</sup> )<br>T = Time (min)                     |
| <b>PSO</b>            | $\frac{t}{q_t} = \frac{1}{k_2 q_e^2} + \frac{1}{q_e} t$ | $q_t = \frac{k_2 q_e^2 t}{1 + k_2 q_e t}$ | $q_t$ = Adsorbed amount at time t (mg g <sup>-1</sup> )<br>$q_e$ = Adsorbed amount at equilibrium (mg g <sup>-1</sup> )<br>$K_2$ = Pseudo-second-order rate constant (g mg <sup>-1</sup> min <sup>-1</sup> )<br>T = Time (min) |
| <b>IPD</b>            | $q_t = C + K_{int} t^{1/2}$                             | $q_t = C + K_{int} t^{1/2}$               | $q_t$ = Adsorbed amount at time t (mg g <sup>-1</sup> )<br>$K_{int}$ = Intra-particle diffusion rate constant (mg g <sup>-1</sup> min <sup>0.5</sup> )<br>C = Boundary layer thickness (mg g <sup>-1</sup> )<br>t = Time (min) |

**Table S.2 Adsorption isotherm models equations and their parameters**

| <b>Isotherm models</b>     | <b>Linear</b>                                           | <b>Non-linear</b>                       | <b>Isotherm parameters</b>                                                                                                                                                                                                                                                                                                                          |
|----------------------------|---------------------------------------------------------|-----------------------------------------|-----------------------------------------------------------------------------------------------------------------------------------------------------------------------------------------------------------------------------------------------------------------------------------------------------------------------------------------------------|
| <b>Langmuir isotherm</b>   | $\frac{1}{q_e} = \frac{1}{Q_0} + \frac{1}{Q_0 K_L C_e}$ | $q_e = q_m K_L \frac{C_e}{1 + K_L C_e}$ | <p><math>q_e</math> = Amount of PND adsorbed per gram of adsorbent at equilibrium (mg g<sup>-1</sup>)</p> <p><math>Q_0/q_m</math> = Maximum adsorption capacity</p> <p><math>K_L</math> = Adsorption capacity constant</p> <p><math>C_e</math> = adsorbent's equilibrium level (mg L<sup>-1</sup>)</p>                                              |
| <b>Freundlich isotherm</b> | $\log q_e = \log K_F + (1/n) \log C_e$                  | $q_e = K_F C_e^{1/n}$                   | <p><math>q_e</math> = Quantity of PND absorbed at equilibrium (mg g<sup>-1</sup>)</p> <p><math>K_F</math> = Freundlich Contant (L mg<sup>-1</sup>)</p> <p><math>C_e</math> = Initial concentration of PND solutions (mg L<sup>-1</sup>)</p> <p><math>1/n</math> = Adsorption intensity</p>                                                          |
| <b>Temkin isotherm</b>     | $q_e = \frac{RT}{b_T} \ln A_T + \frac{RT}{b_T} \ln C_e$ | $q_e = \frac{RT}{b_T} \ln A_T C_e$      | <p><math>q_e</math> = Adsorbed amount at equilibrium</p> <p><math>C_e</math> = Initial equilibrium concentration of the adsorption (mg L<sup>-1</sup>)</p> <p><math>A_T</math> = Temkin constant</p> <p><math>b_T</math> = Related to heat of adsorption</p> <p><math>R</math> = Universal gas constant</p> <p><math>T</math> = Temperature (K)</p> |

**Table S.3 Adsorption isotherm models equations and their parameters**

| Parameter                                            | Range                                                                         | Fixed / Variable<br>Conditions                                              | Purpose                                                                              |
|------------------------------------------------------|-------------------------------------------------------------------------------|-----------------------------------------------------------------------------|--------------------------------------------------------------------------------------|
| <b>Initial PND concentration (mg L<sup>-1</sup>)</b> | 30, 40, 50, 60, 70                                                            | pH = 6;<br>Dose = 5 mg;<br>Contact time = 150 min                           | To determine the effect of initial concentration and equilibrium adsorption capacity |
| <b>Contact time (min)</b>                            | 0, 30, 60, 90, 120, 150                                                       | C <sub>0</sub> = 40 mg L <sup>-1</sup> ;<br>pH = 6;<br>Dose = 5 mg          | To study adsorption kinetics                                                         |
| <b>Solution pH</b>                                   | 2, 4, 6, 8, 10, 12                                                            | C <sub>0</sub> = 40 mg L <sup>-1</sup> ;<br>Dose = 10 mg;<br>Time = 150 min | To study effect of surface charge and ionization on adsorption                       |
| <b>Adsorbent dosage (mg)</b>                         | 2.5, 5, 10, 15, 20                                                            | C <sub>0</sub> = 40 mg L <sup>-1</sup> ;<br>pH = 6;<br>Time = 150 min       | To evaluate optimum BMBC amount for maximum removal                                  |
| <b>Ionic strength</b>                                | NaCl, KCl, CaCO <sub>3</sub> , MgCO <sub>3</sub> , ZnSO <sub>4</sub><br>(1 M) | C <sub>0</sub> = 40 mg L <sup>-1</sup> ;<br>pH = 6;<br>Time = 150 min       | To assess the effect of ionic species on adsorption efficiency                       |
| <b>Pesticide mixtures</b>                            | Binary (PND + PFC, PND + H-20); Ternary (PND + PFC + H-20)                    | 20 & 40 mg L <sup>-1</sup> of each pesticide                                | To evaluate competitive adsorption in multi-component system                         |

**Table S.4 Comprehensive Summary of Chemicals used in this study**

| <b>Chemical / Material</b>                       | <b>Grade / Purity</b>     | <b>Supplier</b>                 | <b>Application</b>                |
|--------------------------------------------------|---------------------------|---------------------------------|-----------------------------------|
| <i>Bacopa monnieri</i> leaf powder               | —                         | Local market,<br>Patan, Gujarat | Biochar precursor                 |
| Pendimethalin (PND)                              | Commercial<br>formulation | TATA Panida,<br>India           | Target pollutant                  |
| Profenocombi (PFC:<br>profenofos + cypermethrin) | Commercial                | Molraxe Agro<br>Chemicals       | Binary/ternary<br>mixture studies |
| H-Twenty (H-20:<br>chlorpyrifos)                 | Commercial                | Hakuba Organics<br>Pvt. Ltd.    | Binary/ternary<br>mixture studies |
| NaCl                                             | AR grade                  | SRL Pvt. Ltd.                   | Ionic strength study              |
| KCl                                              | AR grade                  | SRL Pvt. Ltd.                   | Ionic strength study              |
| CaCO <sub>3</sub>                                | AR grade                  | SRL Pvt. Ltd.                   | Ionic strength study              |
| MgCO <sub>3</sub>                                | AR grade                  | SRL Pvt. Ltd.                   | Ionic strength study              |
| ZnSO <sub>4</sub>                                | AR grade                  | SRL Pvt. Ltd.                   | Ionic strength study              |
| HCl (0.1 M)                                      | Analytical grade          | SRL Pvt. Ltd.                   | pH adjustment                     |
| NaOH (0.01 M)                                    | Analytical grade          | SRL Pvt. Ltd.                   | pH adjustment                     |

**Table S.5 Comprehensive Summary of Instrumentation and Operating Parameters**

| <b>Instrument</b>             | <b>Model /<br/>Manufacturer</b> | <b>Operating Parameters</b>                                    | <b>Purpose</b>                      |
|-------------------------------|---------------------------------|----------------------------------------------------------------|-------------------------------------|
| Muffle furnace                | —                               | 600 °C; 2 h residence;<br>heating rate 10 °C min <sup>-1</sup> | Biochar synthesis                   |
| X-Ray Diffractometer<br>(XRD) | Bruker D8<br>Advance            | 2θ: 3–90°; Cu Kα source                                        | Crystallinity &<br>elemental phases |
| SEM                           | FEI NOVA<br>NanoSEM 450         | Magnification: 25,000× &<br>100,000×; 20 kV; WD: 7<br>mm       | Morphology, pore<br>structure       |
| FTIR Spectrometer             | PerkinElmer<br>S6500            | 4000–550 cm <sup>-1</sup> ; 16 scans                           | Functional group<br>analysis        |
| UV–Vis<br>Spectrophotometer   | Labman<br>LMSPUV1900            | λ <sub>max</sub> for PND: 452 nm                               | Concentration<br>measurement        |
| pH Meter                      | ELICO LI 617                    | Standard calibration                                           | pH & pHZPC<br>determination         |
| Centrifuge                    | REMI                            | 5000 rpm; 10 min                                               | Separation of<br>BMBC               |
| Incubator shaker              | REMI CIS-24 BL                  | 25 ± 2 °C; 150 rpm                                             | Batch adsorption<br>experiments     |

**Table S.6 Comprehensive Summary of Biochar preparation conditions**

| Step                  | Condition / Parameter                          |
|-----------------------|------------------------------------------------|
| Drying                | Shade-dried leaves, ground to powder           |
| Sieving               | 100-mesh stainless steel (<150 $\mu\text{m}$ ) |
| Pyrolysis temperature | 600 $^{\circ}\text{C}$                         |
| Heating rate          | 10 $^{\circ}\text{C min}^{-1}$                 |
| Residence time        | 2 h                                            |
| Oxygen availability   | Limited (closed crucible)                      |
| Pressure              | Ambient                                        |
| Cooling               | Natural cooling inside furnace                 |
| Final processing      | Mild crushing, re-sieving, airtight storage    |
| Biochar yield         | 21.87%                                         |

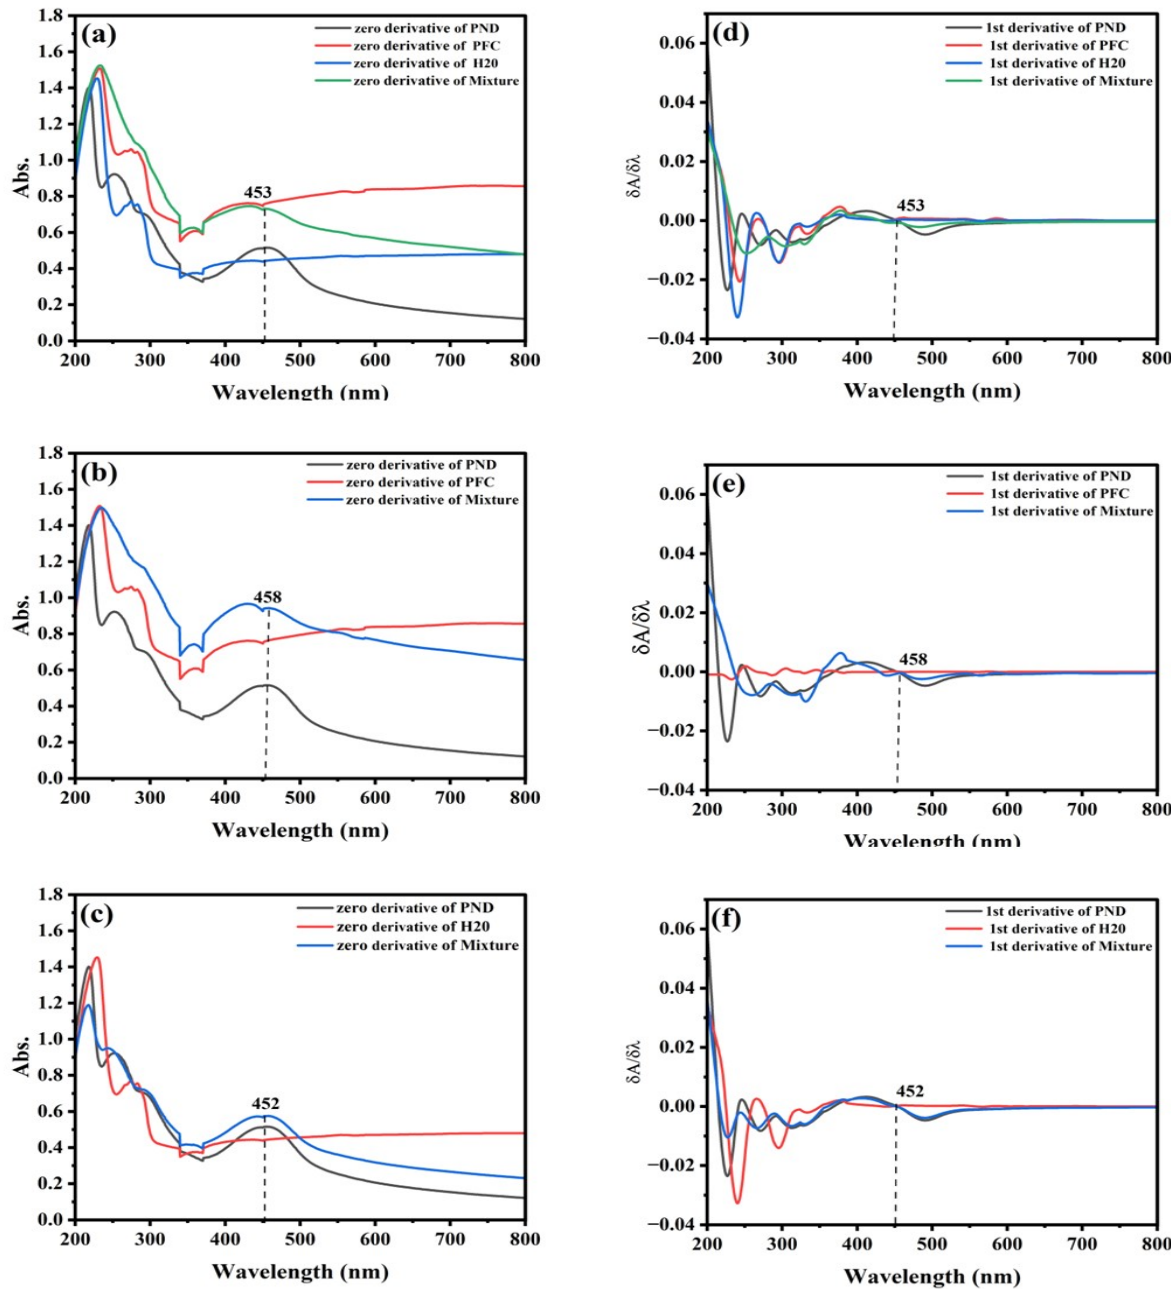

**Fig. S1** Zero-derivative UV-Vis spectra (a-c) and first-derivative spectra (d-f) of PND at 20 mg L<sup>-1</sup> with PFC, H<sub>2</sub>O, and their mixtures.



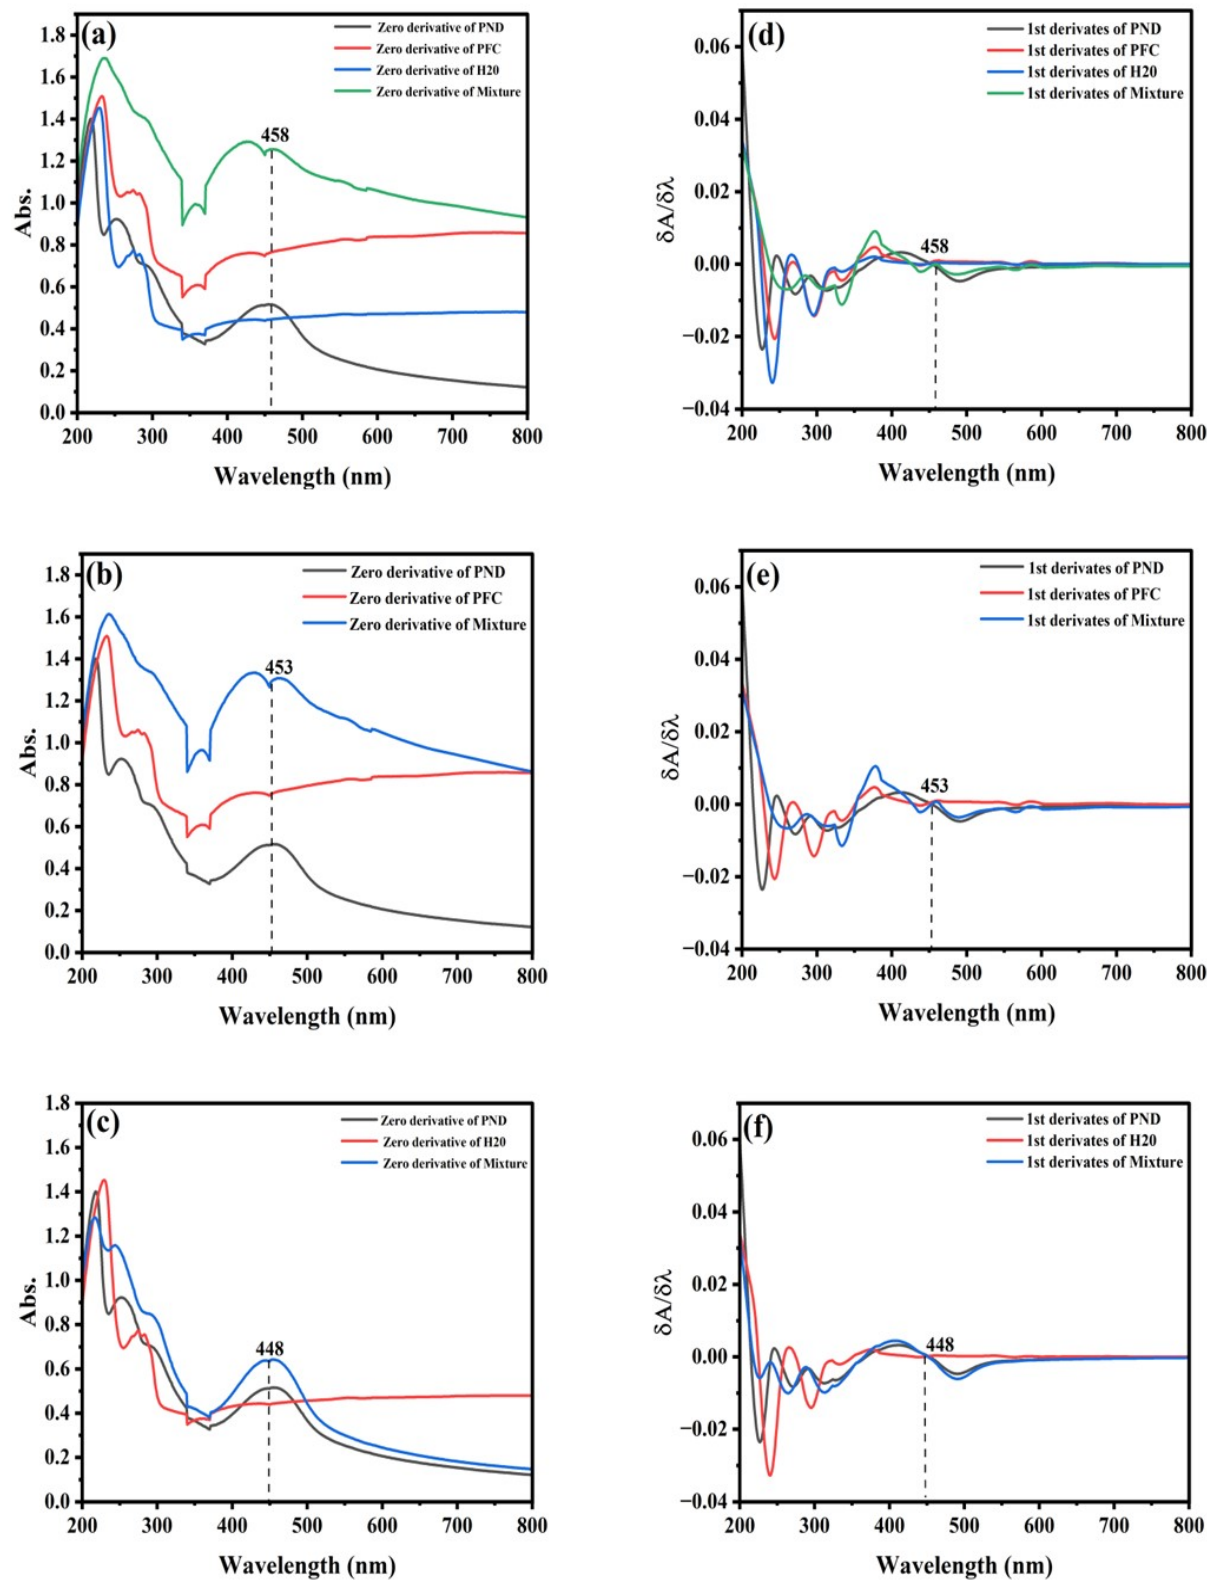

**Fig. S2** Zero-derivative UV-Vis spectra (a-c) and first-derivative spectra (d-f) of PND at 40 mg L<sup>-1</sup> with PFC, H<sub>2</sub>O, and their mixtures.

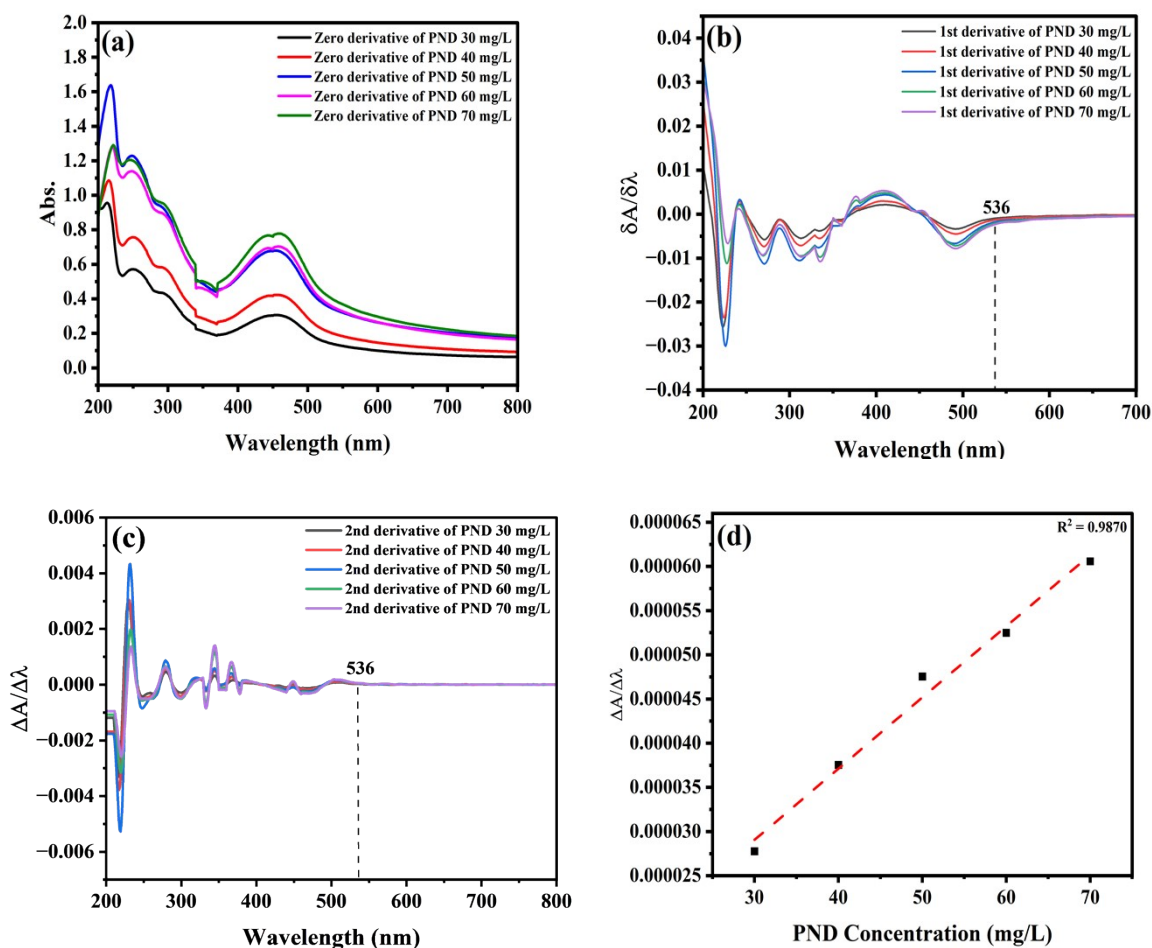

**Fig. S3** Zero-derivative UV-Vis spectra (a), first-derivative spectra (b), second-derivative spectra (c), and calibration curve (d) for PND at various concentrations.

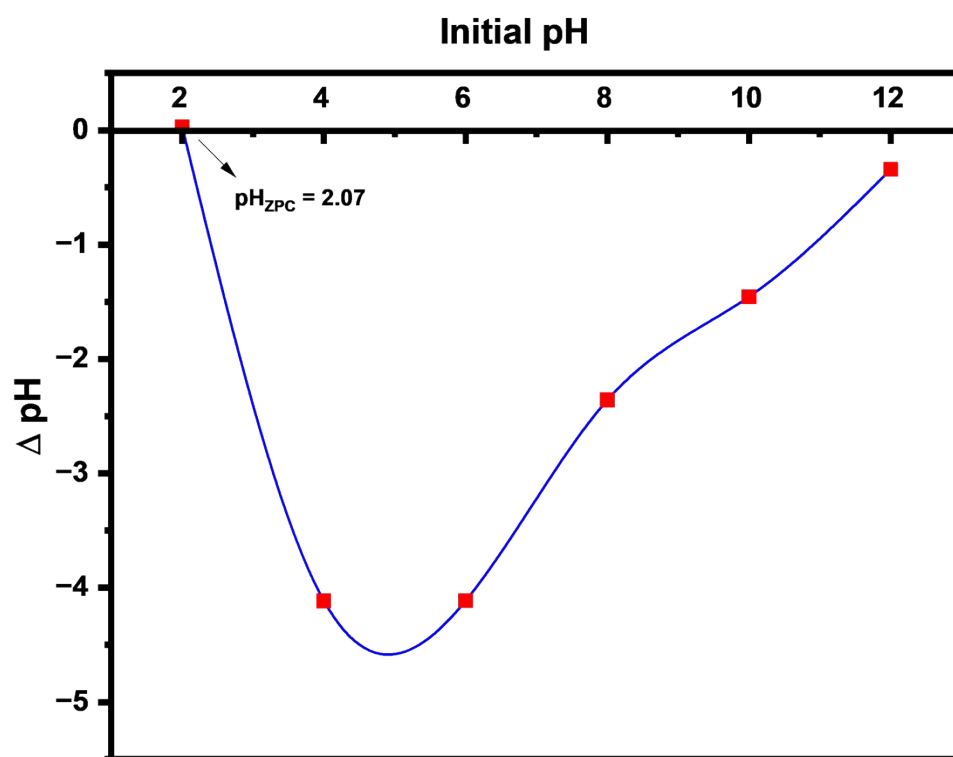

**Fig. S4.**  $\text{pH}_{\text{ZPC}}$  of BMBC using pH drift method.
